1 **MOBILE ELEMENTS HARBOURING HEAVY METAL AND BACITRACIN**

2 **RESISTANCE CASSETTES ARE COMMON AMONG *LISTERIA***

3 ***MONOCYTOGENES* PERSISTING ON DAIRY FARMS**

4 Hanna Castro<sup>1</sup>, Francois Douillard<sup>1</sup>, Hannu Korkeala<sup>1</sup> and Miia Lindström<sup>1</sup>

5 <sup>1</sup>Department of Food Hygiene and Environmental Health, Faculty of Veterinary Medicine,

6 University of Helsinki

7

8 **Corresponding author:**

9 Hanna K. Castro

10 [hanna.castro@helsinki.fi](mailto:hanna.castro@helsinki.fi)

11

12 **Competing interest statement:**

13 This research was supported by the Finnish Ministry of Agriculture and Forestry (Grant

14 Number 618/03.01.02/2017) and by the Walter Ehrström Foundation. The authors have no

15 conflicts of interest to disclose.

16

17

## 18 **Abstract**

19 *Listeria monocytogenes* is a food-borne pathogen and a resilient environmental saprophyte.  
20 Dairy farms are a reservoir of *L. monocytogenes* and strains can persist on farms for years.  
21 Here, we sequenced the genomes of 250 *L. monocytogenes* isolates to investigate the  
22 persistence and mobile genetic elements of *Listeria* inhabiting dairy farms. We performed a  
23 SNP-based phylogenomic analysis to identify 14 monophyletic clades of *L. monocytogenes*  
24 that persistent on the farms for  $\geq 6$  months. We found that prophages and other mobile  
25 genetic elements were on average more numerous among isolates in persistent than  
26 nonpersistent clades, and demonstrated that resistance genes against bacitracin, arsenic and  
27 cadmium were significantly more prevalent among isolates in persistent than nonpersistent  
28 clades. We identified a diversity of mobile elements among the 250 farm isolates, including  
29 three novel plasmids, three novel transposons and a novel prophage harbouring cadmium  
30 resistance genes. Several of the mobile elements we identified in *Listeria* were identical to  
31 the mobile elements of *Enterococci*, indicative of recent transfer between these genera.  
32 Finally, we demonstrated that the CRISPR-*cas* IIa system and a type II restriction-  
33 modification system were negatively associated with persistence on farms. Our findings  
34 suggest that mobile elements support the persistence of *L. monocytogenes* on dairy farms and  
35 that *L. monocytogenes* inhabiting the agroecosystem is a potential reservoir of mobile  
36 elements that may spread to the food industry.

## 37 **Importance**

38 Animal derived raw materials are an important source of *L. monocytogenes* for the food  
39 industry. Knowledge of the factors contributing to the pathogen's transmission and  
40 persistence on farms are essential for designing effective strategies against the spread of the  
41 pathogen from farm to fork. An increasing body of evidence suggests that mobile genetic  
42 elements support the adaptation and persistence of *L. monocytogenes* in the food industry, as  
43 these elements contribute to the dissemination of genes encoding favourable phenotypes,  
44 such as resilience against biocides and thermal stress. Understanding the role of farms as a  
45 potential reservoir of these elements is needed for managing the transmission of mobile  
46 elements across the food chain. Because *L. monocytogenes* coinhabits the farm ecosystem  
47 with a diversity of other bacterial species, it is important to assess the degree to which genetic  
48 elements are exchanged between *Listeria* and other species, as such exchanges may  
49 contribute to rise the novel resistance phenotypes.

## 50 **Introduction**

51 *Listeria monocytogenes* leads a double life: in one it is a potentially lethal, zoonotic  
52 foodborne pathogen and in the other, a ubiquitous environmental saprophyte (Gray et al.,  
53 2006). Agroecosystems provide a favourable habitat for *L. monocytogenes* and the pathogen  
54 is especially prevalent on dairy farms (Nightingale et al., 2004; Esteban et al., 2009). *L.*  
55 *monocytogenes* strains can inhabit dairy farms for years and be widely distributed in the farm  
56 environment, leading to the frequent contamination of milk (Ho et al., 2007; Castro et al.,  
57 2018). Raw milk and animals destined for slaughter are a major contamination source for the  
58 food industry (Samelis & Metaxopoulos 1999; Fox et al., 2009; Hellström et al., 2010).  
59 Knowledge of the pathogens ecology on farms is essential for controlling the spread of *L.*  
60 *monocytogenes* from farms to the food industry.

61 *L. monocytogenes* is extremely resilient and can tolerate various stresses used to control the  
62 pathogen in the food industry (Lundén et al., 2003; Aarnisalo et al., 2007). These phenotypic  
63 traits enable *L. monocytogenes* to survive in food processing environments for years, a  
64 phenomenon known as persistence (Lundén et al., 2000; Keto-Timonen et al., 2007;  
65 Stasiewicz et al., 2015; Pasquali et al., 2018; Hurley et al., 2019). Mobile genetic elements  
66 are common among *L. monocytogenes* isolates from food processing environments (Harvey  
67 & Gilmour, 2001; Pasquali et al., 2018; Hurley et al., 2019) and may harbour genes  
68 mediating tolerance to heat shock (Pöntinen et al., 2017), salt and acid stress (Naditz et al.,  
69 2019; Hingston et al., 2019) and biocides (Müller et al., 2013; Meier et al., 2017). These  
70 findings led us to the hypothesis that mobile genetic elements play a key role in the  
71 environmental adaptation and persistence of *L. monocytogenes*.

72 Although dairy farms are considered a reservoir of *L. monocytogenes* (Nightingale et al.,  
73 2004), and are known to harbour hypervirulent strains (Maury et al., 2019), the era of next

74 generation sequencing has witnessed very few efforts to illuminate the pathogen's ecology in  
75 the farm environment. How *L. monocytogenes* adapts to life in the farm ecosystem, and to  
76 what extent the farm environment acts as source of mobile genetic elements for *L.*  
77 *monocytogenes* persisting in food processing environments, are key issues to explore. Such  
78 insights would be instrumental in developing novel strategies to reduce contamination on  
79 farms and in the raw materials delivered to the food industry.

80 Here, we sequenced the genomes of 250 *L. monocytogenes* isolates obtained from three  
81 Finnish dairy farms during 2013–2016 (Castro et al., 2018) to investigate the persistence and  
82 mobile genomic elements of *L. monocytogenes* in the farm environment. We performed a  
83 SNP-based phylogenomic analysis to group the isolates into persistent and nonpersistent  
84 clades and identified plasmids and chromosomal mobile elements among the 250 genomes.  
85 We found that prophages and other mobile genetic elements were on average more abundant  
86 among isolates in persistent than nonpersistent clades, and that a significantly higher portion  
87 of isolates in persistent than nonpersistent clades harboured genes against bacitracin, arsenic  
88 and cadmium. Finally, we explored genome wide association between gene content and  
89 persistence. We found a negative association between persistence and three putative defence  
90 systems against invading prophages and plasmids (Garneau et al, 2010; Lee et al., 2012).  
91 Taken together, our findings suggest that prophages and mobile genetic elements confer an  
92 ecological advantage for persistence on farms, and that *L. monocytogenes* inhabiting the farm  
93 environment constitutes a reservoir of diverse mobile genetic elements that may spread  
94 upstream the food chain.

95 **Results**

96

97 **Persisting clades of *L. monocytogenes* were detected on all three farms**

98 Whole genome sequencing and subsequent *in silico* subtyping of 250 *Listeria monocytogenes*  
99 isolates, collected from three Finnish dairy farms during 2013–2016 (Castro et al., 2018),  
100 yielded 25 unique multi-locus sequence types (STs) (Fig. 1a, see Supplementary Data S1).  
101 The most frequently detected subtype was ST20, which represented 28% of all sequenced  
102 isolates. In this study, persistent clades of *L. monocytogenes* were defined as monophyletic  
103 clades of isolates with pair-wise distances (PWDs) fewer than 20 SNPs (Pightling et al.,  
104 2018) that were isolated from the same farm from  $\geq 3$  samples during  $\geq 6$  months. Clades that  
105 did not meet these criteria were classified as nonpersistent. We identified in total 14  
106 persistent clades (Fig. 2, Table 1). Persistent clades represented 71% of all sequenced isolates  
107 and all persistent clades belonged to serogroup 1/2a. Clade C4 contained isolates from two  
108 different farms, suggesting that strains of *L. monocytogenes* can spread between farms faster  
109 than the rate of genomic diversification.

110

111 Pathogenicity islands associated with hypervirulence (LIPI-3, LIPI-4) were detected in 5% of  
112 the 250 isolates, none of which belonged to persistent clades. None of the 250 isolates  
113 harboured a premature stop codon within the *inlA* gene, which is associated with  
114 hypovirulence and is a common finding in *L. monocytogenes* from food processing  
115 environments (Maury et al., 2016). Indeed, the two STs most strictly associated with the food  
116 processing environments, namely 9 and 121 (Maury et al., 2016), were not detected in this  
117 study.

118

119 **Mobile genetic elements were on average more numerous among isolates in persistent**  
120 **than nonpersistent clades of *L. monocytogenes***

121 Overall, prophages and other mobile genetic elements were significantly more numerous  
122 (Independent Samples Median Test;  $p < .01$ ) among isolates in persistent than nonpersistent  
123 clades (Fig. 1b-c). Resistance cassettes against cadmium and arsenic were detected in 20 and  
124 15 % of isolates, respectively. Mobile elements harbouring resistance genes against arsenic  
125 and cadmium were significantly more prevalent among persistent clade isolates than  
126 singleton isolates (Fig. 3d). Surprisingly, 12% of all *L. monocytogenes* isolates, harboured  
127 putative bacitracin resistance cassette (Manson et al., 2004), located on the transposon  
128 Tn5801\_B23. Other antimicrobial or biocide resistance genes were not detected in this study.

129

130 **Dairy farm isolates of *L. monocytogenes* harboured plasmids that are common in the**  
131 **food industry and three novel plasmids**

132 Plasmids were detected among 10% of *L. monocytogenes* isolates in persistent clades and  
133 11% singleton isolates. We detected three previously identified plasmids (pCFSAN010068,  
134 pLM58, pLMR479a), and three novel plasmids, labelled pHC143, pHC192 and pHC195-2  
135 (Fig. 3a, see Supplementary Data S1). These plasmids were 55.5 – 86.7 Kb in size, except for  
136 pHC192, which was only 4.6 Kb. A Maximum-Likelihood phylogenetic analysis based on  
137 RepA grouped the five large plasmids into the plasmid groups G1, G2 and G4 (Kuenne et al.,  
138 2010; Schmitz-Esser et al., 2021), which appear to be specific to the genus *Listeria* (Fig. 4a).

139 Plasmid groups G1 and G2 composed of several well-characterized *L. monocytogenes*  
140 reference plasmids that are common in food processing environments (Kuenne et al., 2010;  
141 Hingston et al., 2019; Nadiz et al., 2019). pHC143 represented G4, a novel group of *Listeria*  
142 plasmids (Schmitz-Esser et al., 2021). The pHC143 plasmid was detected in five isolates of

143 this study, belonging to STs 6 and 149 (see Supplementary Data S1). These STs are  
144 hypervirulent, based on the presence of pathogenicity islands LIPI-3 (ST6) and LIPI-4  
145 (ST149) (Fig. 2). Visualisation of assembly graphs indicated that pHC143 was successfully  
146 assembled into a single 55.8 Kb contig in all five isolates. pHC143 contained no biocide or  
147 heavy metal resistance genes. However, we identified three variants of pHC143 among short-  
148 read sequence assemblies deposited in GenBank, all of which contain resistance genes against  
149 biocides (Fig. 4b, see Supplementary Fig. S1). The first variant contains a benzalkonium  
150 chloride resistance cassette (*bcrABC*) and a mercuric resistance (*mer*) operon. The second  
151 variant contains a multidrug exporter putatively conferring resistance against quaternary  
152 ammonium compounds (*qacC/qacH*; WP\_000121134.1). The third variant contains the  
153 *qacC/qacH* gene and a Tn554-family transposon carrying an arsenic resistance operon  
154 (*arsABCD*). This Tn554-family transposon was identified previously in the chromosomes of  
155 *L. monocytogenes* (Kuenne et al., 2013). All G4 plasmids contained a predicted fimbrial  
156 adhesin (WP\_061691480.1), suggestive of a role associated with attachment and host  
157 colonisation (Ageorges et al., 2020).

158

159 Assembly graphs of pHC192 suggested that the plasmid was also closed successfully into a  
160 single 4.6 Kb contig. pHC192 did not contain replication proteins related to the RepA of  
161 *Listeria* plasmid groups G1-G4, so the phylogeny of this plasmid was analysed using RepB  
162 (Fig. 5a). Phylogenetically, pHC192 clustered closely with plasmids from *Lactobacillus*.  
163 Indeed, RepB of pHC192 (WP\_035147907.1) was also detected in *Lactobacilli* and  
164 *Brochothrix* (100% amino acid sequence identity), suggestive of a broad host range for this  
165 plasmid. The closest relative of pHC192 in *Listeria* was the plasmid of the *L. monocytogenes*  
166 strain CFIAFB20130002, which possesses the lincosamide resistance gene *lnuA*  
167 (WP\_001829870.1). Notably, RepB of pHC192 bore no similarity to the replication proteins



168 of the small *Listeria* plasmids pIP823 (WP\_172694646.1) and pDB2011 (WP\_020277964.1)  
169 and shared only 45% amino acid identity with the RepB of pLMST6 (WP\_061092472.1).  
170 Like pHC192, pLMST6 appears to also have a broad host range, as 100% identical  
171 homologues of pLMST RepB (WP\_061092472.1) were detected in *Listeria*, *Salmonella* and  
172 *Enterococcus*. These findings suggest that pHC192 and pCFIAFB20130002 represent a novel  
173 phylogenetic group of small *Listeria* plasmids (G5) that are distinct from the pLMST6 family  
174 of plasmids (G6), implying that several phylogenetically unrelated small plasmids have been  
175 acquired by *Listeria* through distinct transfer events across host species.

176 The plasmid pHC192 contains a putative *tauE/safE* -family sulphite exporter gene  
177 (WP\_016896343.1) (Fig.5b) that is not typically present in *Listeria* plasmids (Hingston et al.,  
178 2019; Schmitz-Esser et al., 2021). The sequencing depth of coverage for pHC192 was  
179 approximately five times that of the chromosome, suggesting that pHC192 is a high copy  
180 number plasmid. This plasmid became increasingly prevalent among persistent clade C7  
181 isolates during the sampling period and was detected in all isolates at the end of the study  
182 (Fig. 5c). An additional plasmid, pHC195-2, was detected in several isolates in the latter part  
183 of the study period. The pHC195-2 plasmid belonged to the phylogenetic group G2 (Fig. 4a)  
184 and closely resembled the reference plasmid pLMR479a (see Supplementary Fig. S2). The  
185 acquisition of these plasmids during the course of persistence suggests that they play a role in  
186 the adaption of the pathogen to the farm ecosystem.

187

## 188 **Dairy farm isolates of *L. monocytogenes* share common integrative mobile elements with** 189 ***Enterococci***

190 Among the 250 dairy farm isolates we identified six chromosomally located mobile elements:  
191 the *L. monocytogenes* IS3-like elements (Kuenne et al., 2013); *Listeria* Genomic Island 2

192 (LGI-2) (Lee et al., 2017); Tn5801\_B23 (León-Sampedro et al., 2016); and three novel  
193 mobile elements, which were submitted to the Transposon Registry (Tansirichaiya et al.,  
194 2019), and assigned the labels Tn7101, Tn7103 and Tn7104. The elements ICELm1 (Kuenne  
195 et al., 2013), LGI-1 (Gilmour et al., 2010), LGI-3 (Palma et al., 2020), Tn5422 (Lebrun et al.,  
196 1994), Tn554 (Kuenne et al., 2013), Tn6188 (Müller et al., 2013), Tn6198 (Bertsch et al.,  
197 2013), and chromosomally located Tn5422 (Lebrun et al., 1994) were not detected.

198 The IS3-like transposon was significantly more prevalent among isolates in persistent than  
199 nonpersistent clades (Fig. 3b). The IS3-like transposon consists of two insertion sequences in  
200 Lineage I (IS-1 and IS-2) and a single insertion sequence in Lineage II (IS-3) (Fig. 2). These  
201 elements harbour multiple surface-associated lipoproteins, which may facilitate attachment  
202 and invasion (Kuenne et al., 2013). The suggested role of the IS3-like transposon in *L.*  
203 *monocytogenes* virulence remains to be determined.

204 The integrative and conjugative elements (ICEs) LGI-2 and Tn5801\_B23 were significantly  
205 more prevalent among persistent clade isolates than singleton isolates (Fisher's Exact Test,  
206  $p < .01$ ) (Fig. 3b). LGI-2 carries cadmium and arsenic resistance cassettes and two multidrug  
207 transporters (see Supplementary Fig. S3). Identical (100% nucleotide identity) LGI-2 were  
208 present among all ST14 and ST145 isolates of this study (Fig. 2). Moreover, BLASTn search  
209 identified identical LGI-2 in 11 *L. monocytogenes* and two *Enterococcus faecalis* complete  
210 genomes (see Supplementary Table S2), suggestive of recent transfer between these species.

211 Tn5801\_B23 was detected in a subset of ST20 isolates, including the persistent clades C9 –  
212 C12 (Fig. 2, see Supplementary Data S1). Tn5801\_B23 detected in this study shared 97%  
213 identity with the Tn5801\_B23 of the *E. faecalis* strain JH2-2 (see Supplementary Fig. S4).

214 Tn5801\_B23 contains putative resistance genes against the antimicrobial bacitracin (*bcrABD*)  
215 and a two-component system (*baeSR*) potentially involved in the regulation of the *bcrABD*

216 operon (León-Sampedro et al., 2016). Unlike Tn5801\_B23, other Tn5801-like elements  
217 mediate tetracycline resistance in *Enterococcus*, *Listeria* and several other Firmicute species  
218 (León-Sampedro et al., 2016). In *L. monocytogenes* ST20, Tn5801\_B23 was inserted  
219 downstream of *guaA* (*lmo1096*), which is also the insertion site of the related element  
220 ICELm1 of the *L. monocytogenes* strain EGD-e, harbouring cadmium resistance genes  
221 (Kuenne et al., 2013).

222 The putative integrative and mobilizable element (IME) Tn7101 was detected in the ST155  
223 singleton isolate HC258, where it was inserted between homologues of *lmo2596* and  
224 *lmo2597* (see Supplementary Fig. S3). Tn7101 contains resistance genes against cadmium  
225 (*cadA*, *cadC*) and an arsenate reductase (*arsC*). Through a BLAST search we identified a  
226 variant of the Tn7101 containing a seven gene arsenic resistance cassette. This variant,  
227 labelled Tn7102, was detected in several *L. monocytogenes* and *Enterococcus* genomes  
228 deposited in GenBank (see Supplementary Fig. S2). The Tn7101 and Tn7102 of *Listeria* and  
229 *Enterococcus* were identical (100% nucleotide identity), suggestive of recent promiscuity  
230 between the two genera. Arsenic resistance genes in Tn7102 were distantly related ( $\geq 67\%$   
231 identity) to the arsenic resistance cassette of LGI-2 (see Supplementary Fig. S3).

232 The putative IME Tn7103 was detected in the ST119 singleton isolate HC183, where it was  
233 inserted between *lmo0810* and *lmo0811*. This transposon contained putative virulence genes  
234 encoding an InlJ-like internalin and a bacterial immunoglobulin (Big)-like protein (see  
235 Supplementary Fig. S5). A BLAST search confirmed the presence of Tn7103 in other *L.*  
236 *monocytogenes* strains, including N12-2532 (SAMN09947958), but we did not identify this  
237 element in other species.

238 The putative ICE Tn7104 was detected in the ST391 singleton isolate HC187 and was  
239 inserted between *lmo1786* and *lmo1787*. This transposon contained a putative type I

240 restriction-modification system (see Supplementary Fig. S6). Tn7104 was identified in  
241 several other *L. monocytogenes* strains deposited in GenBank, including the *L.*  
242 *monocytogenes* ST391 strain SHL013 (SAMN03265960), but we did not identify this  
243 element in other species.

244

245 **A novel prophage harbouring cadmium resistance genes was identified in a persistent**  
246 **clade of *L. monocytogenes***

247 All 250 dairy farm isolates from this study contained the *L. monocytogenes* monocin (Zink et  
248 al., 1995), and 0 – 3 additional prophages, which were detected at eight insertion sites (Fig.  
249 3c). Prophages inserted into tRNA-Arg(tct) were significantly more prevalent among isolates  
250 in persistent clades, and prophages inserted into tRNA-Lys(ctt) were significantly more  
251 prevalent among nonpersistent clades (Fisher's Exact Test,  $p < .05$ ).

252 OPTSIL taxonomic clustering assigned prophages from this study into six genera. Prophages  
253 inserted into *comK* and tRNA genes were assigned to genera of *Siphoviridae* that are known  
254 to only infect *Listeria*. Surprisingly, in the isolate HC189, a 67 Kb *Myovirus* was inserted into  
255 *comK*, a site usually occupied by *Siphoviridae* (Pasechnek et al., 2020).

256 Prophages inserted between the *rlmCD* (*lmo1703*) and *fosX* (*lmo1702*) genes were not related  
257 to any of the *Listeria* specific phage genera, but instead represented a separate genus that  
258 infects several Firmicute species (Fig. 6). Many of the phages in this genus harbour  
259 antimicrobial and heavy metal resistance cassettes (see Supplementary Fig. S7). In this study,  
260 phages inserted between the *rlmCD* and *fosX* were detected among all isolates of persistent  
261 clade C8 and among three singleton isolates (see Supplementary Data S1). Among isolates of  
262 persistent clade C8, prophages inserted between *rlmCD* and *fosX* all harboured a cadmium  
263 resistance cassette (see Supplementary Fig. S7). In contrast, in the singleton isolates

264 prophages inserted between *rlmCD* and *fosX* harboured no cadmium or antimicrobial  
265 resistance genes. Within *Listeria* genomes deposited in GenBank, we identified prophages  
266 inserted between *rlmCD* and *fosX* that carried resistance genes against cadmium (*cadA*),  
267 macrolides (*mefA*, *msrD*), tetracycline (*tetM*) and streptogramin (*vatA*).

268

269 **Systems that protect against invading DNA were negatively associated with the**  
270 **persistence of *L. monocytogenes* on dairy farms**

271 A genome wide association study was conducted to assess which genes were associated with  
272 persistent versus nonpersistent clades. Because no persistent clades belonged to Lineage I, the  
273 analysis was restricted to Lineage II. Among the genes that were positively associated with  
274 persistence on dairy farms were a gene associated with biofilm formation (*bapL*), a  
275 peptidoglycan hydrolase (*murA*) (see Supplementary Table S3). Interestingly, *bapL* has  
276 previously been implicated in the adaptation of *L. monocytogenes* to the food processing  
277 environment (Maury et al., 2019). In contrast, genes associated with the CRISPR-*cas* type  
278 IIA system, and the type II restriction-modification system LmoJ3 (Lee et al., 2012) were  
279 negatively associated with persistence in the dairy farm environment (see Supplementary  
280 Table S3). CRISPR-*cas* systems and restriction-modification systems may act in synchrony  
281 to protect the host against invading prophages and other mobile elements (Price et al., 2016).  
282 Additionally, a putative recombination and DNA strand exchange inhibitor protein  
283 (WP\_03166494.1) was negatively associated with persistence. These findings agree with the  
284 lower prevalence of mobile genetic elements and prophages among isolates in nonpersistent  
285 than persistent clades and suggest that systems involved with inhibiting invading DNA are  
286 detrimental for the persistence of *L. monocytogenes* in the dairy farm environment.

287 *L. monocytogenes* hypervariable hotspots 1 and 8 (Kuenne et al., 2013) contained genes both  
288 positively and negatively associated with persistence. Hypervariable hotspot 1 consists of a  
289 ESX-1 like type VII secretion system (T7SS) that has a suggested role in bacterial  
290 antagonism (Bowran & Palmer, 2021). Indeed, most genes associated with persistence  
291 belonged to *L. monocytogenes* hypervariable hotspots or prophages, suggesting that the role  
292 these components play in *Listeria* niche adaptation deems further study.

293

## 294 **Discussion**

295 Whole genome sequencing and subsequent analyses of 250 *L. monocytogenes* isolates from  
296 dairy farms illustrated that dairy farm isolates are hosts to a diversity of mobile genetic  
297 elements that carry, or have the potential to carry, resistance genes against antimicrobials,  
298 biocides and heavy metals. We found that prophages and other mobile genomic elements  
299 were significantly more numerous among isolates belonging to persistent than nonpersistent  
300 clades. Moreover, systems that provide immunity against invading mobile genetic elements  
301 (Garneau et al, 2010; Lee et al., 2012; Price et al., 2016), namely the CRISPR-*cas* IIA  
302 system, the type II restriction-modification system LmoJ3, and a putative recombination and  
303 DNA strand exchange inhibitor protein, were negatively associated with persistence. These  
304 findings suggest that mobile elements may support the persistence of *L. monocytogenes*  
305 inhabiting farms. Many of the mobile elements we identified carried genes encoding  
306 phenotypes that promote the survival of *L. monocytogenes* on farms, such as antimicrobial  
307 resistance genes or virulence factors. Moreover, genes responsible for the conjugation of  
308 mobile elements may have a dual role in promoting biofilm formation and invasion of the  
309 mammalian host (Barrios et al., 2005; Ageorges et al., 2020), thereby supporting the  
310 survival of *L. monocytogenes* on farms.

311 We identified a surprising diversity of mobile genetic elements encoding heavy metal  
312 resistance genes among the dairy farm isolates and acquired heavy metal resistance genes  
313 were more common among isolates in persistent than nonpersistent clades. Similarly, heavy  
314 metal resistance genes are more prevalent among persistent than nonpersistent *L.*  
315 *monocytogenes* subtypes from foods and food processing environments (Harvey & Gilmour,  
316 2001; Pasquali et al., 2018). Whether heavy metal resistance genes contribute to persistence  
317 or merely co-occur with other fitness enhancing determinants remains unclear (Parsons et al.,  
318 2020). Nevertheless, heavy metal resistance genes may represent useful markers to aid the  
319 detection of *L. monocytogenes* strains with fitness-enhancing mobile genetic elements.

320 In the present study we found a novel plasmid (pHC143; plasmid group G4) that infected  
321 hypervirulent subtypes of *L. monocytogenes*. Although pHC143 was devoid of biocide and  
322 heavy metal resistance genes, such genes are common on other G4 plasmids infecting  
323 hypervirulent ST1 and ST6 strains (Schmitz-Esser et al., 2021). Indeed, we noted that a G3  
324 plasmid harbouring the biocide resistance gene *qacC* and the arsenic resistance cassette  
325 *arsABCD* in the ST6 outbreak isolate YA00079283, associated with the largest listeriosis  
326 outbreak known to date (Smith et al., 2019).

327 We identified four transposons in *Listeria*, namely LGI-2, Tn5801\_B23, Tn7101 and  
328 Tn7102, that closely resembled transposons in *Enterococci*, suggestive of recent transfer  
329 between the two genera. The co-occurrence of genomic elements in *Enterococci* to *Listeria*  
330 was unsurprising, as both genera are highly prevalent in animal faeces and farms (Franz et al.,  
331 1999; Hellström et al., 2010; Castro et al., 2018). Transfer of conjugative elements has been  
332 demonstrated both from *Enterococci* to *Listeria* and vice versa (Jahan & Holley, 2016;  
333 Haubert et al., 2018) indicating that both genera are potential donors. The extent to which  
334 *Enterococci* and other Firmicutes contribute to the horizontal spread of mobile elements and

335 their associated antimicrobial, biocide and heavy metal resistance determinants in *Listeria* has  
336 implications for food safety and should be explored through further study.

337 Bacitracin resistance genes, mediated by Tn5801\_B23, were common among *L.*  
338 *monocytogenes* from all three farms investigated. Moreover, Tn5801\_B23 was significantly  
339 more prevalent among isolates in persistent clades than nonpersistent clades. The widespread  
340 use of bacitracin as a growth promoter in animal feeds has facilitated the expansion of  
341 bacitracin resistance in *Enterococci* (Aarestrup et al, 2000; Chen et al., 2016), and probably  
342 also *L. monocytogenes*, as animal feeds are frequently contaminated by *Listeria* (Hellström et  
343 al., 2010; Castro et al., 2018). Nevertheless, the frequent detection of Tn5801\_B23 in this  
344 study remains curious, as feed supplementation with bacitracin subsided in Finland in the  
345 1990's (Aarestrup et al., 2000).

346 We found that prophages were more prevalent among persistent clade isolates than singleton  
347 isolates. It is unclear whether the higher number of prophages among persistent clade isolates  
348 represents a beneficial role for these elements or is a side effect of being receptive to foreign  
349 DNA. There is increasing evidence that prophages can mediate beneficial phenotypes for  
350 their host. Phages mediate resistance or virulence properties in numerous bacterial species  
351 (Harrison & Brockhurst, 2017), and in *Listeria*, *Siphoviruses* inserted into *comK* were found  
352 to regulate the gene in a symbiotic manner (Pasechnek et al. 2020). Here, we discovered  
353 phage-mediated carriage of cadmium resistance and various antimicrobials in *Listeria*,  
354 suggesting that prophages contribute to the spread of phenotypes supporting persistence.  
355 Moreover, we noted that these phages belonged to a genus of *Siphovirus* with an apparently  
356 broad host species range that were introduced to *Listeria* through several distinct transfer  
357 events. Host species jumps have the potential accelerate the transfer of novel resistance  
358 determinants between *Listeria* and other Firmicutes.



359 It is worth noting that not all persistent clades harboured mobile elements, suggesting that  
360 other factors also contribute to the survival of *L. monocytogenes* on dairy farms. We found  
361 that genes putatively involved in biofilm formation (*bapL*) and interbacterial competition  
362 (T7SS), which are not located in mobile elements, were significantly associated with  
363 persistence. In addition, the predominance of persistent *L. monocytogenes* strains in the dairy  
364 farm environment is associated with inadequacies in production hygiene (Castro et al., 2018).  
365 Therefore, the persistence of *L. monocytogenes* in the dairy farm environment is likely the  
366 result of a multifactorial combination of bacterial and environmental factors.

367 In conclusion, our study indicates that *L. monocytogenes* inhabiting the dairy farm  
368 environment are receptive to a diversity of prophages and mobile genetic elements. We  
369 suggest that mobile elements enable *L. monocytogenes* to adapt to the stresses encountered in  
370 the farm ecosystem and in general improve the fitness of the pathogen on farms, thereby  
371 supporting persistence. Given the abundance of *L. monocytogenes* on farms (Nightingale et  
372 al., 2004; Esteban et al., 2009; Castro et al., 2018) and the apparent exchange of mobile  
373 genetic elements between *Listeria* and other Firmicute species, *L. monocytogenes* occurring  
374 in agroecosystems should be viewed as a potential reservoir of mobile genetic elements.  
375 Importantly, many of these elements have the potential to carry and spread antimicrobial,  
376 biocide, and heavy metal resistance genes. The spread of mobile genetic elements and  
377 resistance determinants from primary production to *Listeria* in the food processing  
378 environments has important food safety implications and should be explored further. The  
379 present study represents a step forward in this effort and in our understanding of listerial  
380 ecology in the agroecosystem.

381

## 382 **Methods**

383

### 384 **Whole genome sequencing**

385 Altogether 250 *L. monocytogenes* isolates obtained from three Finnish dairy cattle farms  
386 during 2013–2016 (Castro et al., 2018) were selected for whole genome sequencing in the  
387 present study (see Supplementary Data S1). DNA was extracted from overnight cultures  
388 using the guanidium thiocyanate extraction method (Pitcher et al. 1989). DNA samples were  
389 standardized to a concentration of 10 ng/μl using the dsDNA BR Assay Kit (Thermo Fisher  
390 Scientific; Waltham, MA, USA) using the Qubit Fluorometer (Thermo Fisher Scientific).  
391 Genomic libraries were constructed from the DNA samples using the Nextera XT DNA  
392 Sample Preparation Kit (Illumina; San Diego, CA, USA), and paired-end sequencing (2×250  
393 bp) was performed using the Illumina HiSeq platform.

394

### 395 **Genome assembly, pangenome construction, subtyping**

396 Following the removal of adapter sequences and low-quality reads using Trimmomatic 0.36  
397 (Bolger et al., 2014), draft genomes were assembled using SPAdes 3.9 with K-mer values 55,  
398 77, 99, 113 and 127 (Bankevich et al., 2012). Assembly quality was assessed using QUAST  
399 4.0 (Gurevich et al., 2013) and taxonomic assignment was performed using Kraken (Wood &  
400 Salzberg, 2014). The assemblies were annotated using Prokka 1.12 (Seemann, 2014). The  
401 pangenome of the sequenced isolates was constructed using Roary 3.8.0 (Page et al., 2015)  
402 with the protein identity cut-off value set at 90%. Multi Locus Sequence Types (ST) were  
403 determined *in silico* from the assembled genomes using the BIGSdb-*Lm* database (Moura et  
404 al., 2017), which utilizes the schema developed by Ragon et al. (2008). The BIGSdb-  
405 *Lm* database was also used to identify pathogenicity islands associated with hypervirulence

406 (LIPI-3, LIPI-4), and genes associated with antimicrobial and biocide resistance among the  
407 assembled genomes. Genome assemblies were deposited in GenBank under the BioProject  
408 number PRJNA704814 (see Supplementary Data S1).

409

#### 410 **Maximum-Likelihood Phylogenomic Analysis**

411 Phylogenomic reconstruction of the 250 *L. monocytogenes* isolates was performed using the  
412 Lyve-SET 1.1.4f pipeline (Katz et al., 2017), using *L. monocytogenes* EGD-e genome  
413 (NC\_003210.1) as reference. The Lyve-SET pipeline was run using *Listeria monocytogenes*  
414 pre-sets (Katz et al., 2017), with additional options --mask-phages, --mask-cliffs, and --  
415 read\_cleaner CGP. In brief, the pipeline generated genome alignments by mapping quality-  
416 filtered reads to a reference genome. To improve the accuracy of phylogenomic inference,  
417 putative prophage genes were removed from the reference genome prior to mapping.  
418 Mapping was followed by the detection of high-quality SNPs, having  $\geq 10x$  depth of  
419 coverage and  $\geq 75\%$  consensus among reads. Recombinant sites within the genome  
420 alignments generated by Lyve-SET were identified and removed using Gubbins 3.0  
421 (Croucher et al., 2015). PhyML 3.3 (Guindon et al., 2010) was used to infer Maximum-  
422 Likelihood -phylogeny of each ST using a general time reversible model (GTR) with 100  
423 bootstrap replicates.

424

425 In addition, the phylogeny of each ST harbouring putative persistent clades was inferred  
426 individually. Persistent clades of *L. monocytogenes* were defined monophyletic clades of  
427 isolates with PWDs  $< 20$  SNPs (Pightling et al., 2018) that were isolated from the same farm  
428 from  $\geq 3$  samples during  $\geq 6$  months. For each ST, a draft assembly from the present study  
429 with the best quality statistics, i.e. the highest N50 value and lowest number of contigs (see

430 Supplementary Data S1), was used as a reference genome. The phylogenomic analyses were  
431 executed as described above using the Lyve-SET pipeline, Gubbins and PhyML.

432

### 433 **Detection and analysis of plasmids**

434 Plasmids were identified by aligning the whole genome assemblies against *Listeria* plasmids  
435 deposited in GenBank with the aid of BLASTn (<http://www.ncbi.nlm.nih.gov/blast>).

436 Alignments were inspected manually. Additionally, whole-genome assembly graphs

437 generated by SPAdes were visualized using Bandage 0.8.1 (Wick et al., 2015) and

438 extrachromosomal elements were inspected manually. Maximum-Likelihood phylogeny of

439 the plasmids, based on the amino acid sequence alignments of the *repA* gene, were generated

440 with MEGA7 (Kumar et al., 2016), using the Jones-Taylor-Thornton substitution model with

441 100 bootstraps. Alignments of the amino acid sequences of the *repB* gene were used to

442 compare plasmids in which *repA* was absent. Plasmid alignments were generated and

443 visualized using BRIG 0.95 (Alikhan et al., 2018) and EasyFig 1.2 (Sullivan et al., 2011).

444

### 445 **Detection and analysis of chromosomal mobile genetic elements**

446 The occurrence of the chromosomal mobile genetic elements ICELm1 (Kuenne et al., 2013),

447 LGI-1 (Gilmour et al., 2010), LGI-2 (Lee et al., 2017), LGI-3 (Palma et al., 2020), Tn5422

448 (Lebrun et al., 1994), Tn6188 (Müller et al., 2013), Tn6198 (Bertsch et al., 2013), and the

449 IS3-like and Tn554-like transposons of *L. monocytogenes* (Kuenne et al., 2013), among

450 isolates from this study was assed, by aligning the integrases, transposases, recombinases

451 associated with these elements against the pangenome (the pan\_genome\_reference -file

452 generated by Roary) with the aid of tBLASTn. Hits were inspected manually. Additionally,

453 the pangenome was searched for annotations including “recombinase”, “integrase”,

454 “transposase”, “transposon”, “cadmium”, “arsenic”, “mercuric”, “*ardA*”, “*ftsK*”, “P60” and  
455 “*iap*” and hits were inspected manually. EasyFig 1.2 was used to align and visualize the  
456 identified transposons and their occurrence among genomes deposited in GenBank was  
457 assessed using BLAST.

458

### 459 **Detection and analysis of prophages**

460 Prophages inserted into the *L. monocytogenes* genomes were identified using PHASTER  
461 (Arndt et al., 2016) and the insertion sites were inspected manually. Phylogeny and  
462 taxonomic clustering of prophages classified by the PHASTER algorithm as “intact” were  
463 inferred using VICTOR (Meier-Kolthoff & Göker, 2017). Nineteen additional *Listeria* phage  
464 genomes and one Streptococcal phage genome obtained from GenBank were included in the  
465 analyses for reference (see Supplementary Table S1). In brief, VICTOR applies the Genome-  
466 BLAST Distance Phylogeny (GBDP) method (Meier-Kolthoff et al., 2013) to obtain pairwise  
467 distances, from which balanced minimum evolution trees are inferred. VICTOR utilizes  
468 OPTSIL (Göker et al., 2009) to obtain taxonomic clustering. Duplicate phage genomes are  
469 removed from the analysis. Trees generated by VICTOR were visualized using FigTree 1.4.4  
470 (<http://tree.bio.ed.ac.uk/software/figtree/>). BLAST was used to identify phages inserted  
471 between *rlmCD* and *fosX* in the genomes of *Listeria* and other bacterial species deposited in  
472 GenBank, and hits were inspected manually. Phylogeny and taxonomic clustering of  
473 prophages inserted between *rlmCD* and *fosX* were inferred using VICTOR.

474

### 475 **Identification of genes associated with predominance**

476 Scoary 1.6.16 (Brynildsrud et al., 2016) was used to identify genes significantly associated  
477 with occurrence in persistent clade isolates versus singleton isolates. Scoary was executed

478 using default options, using the gene\_presence\_abence.csv -file generated by Roary as input.  
479 Associations with a Bonferroni corrected  $p < .05$  were considered significant. As all  
480 predominant clades belonged to Lineage II, the analysis was limited to the 233 Lineage II  
481 isolates of this study to reduce noise arising from population structure bias.

## 482 **References**

- Aarestrup, F. M., Kruse, H., Tast, E., Hammerum, A. M., & Jensen, L. B. (2000). Associations between the use of antimicrobial agents for growth promotion and the occurrence of resistance among *Enterococcus faecium* from broilers and pigs in Denmark, Finland, and Norway. *Microb. Drug Resist.* **6**, 63–70.
- Aarnisalo, K., Lundén, J., Korkeala, H. & Wirtanen, G. (2007) Susceptibility of *Listeria monocytogenes* strains to disinfectants and chlorinated alkaline cleaners at cold temperatures. *LWT-Food Sci. Technol.* **40**, 1041–1048.
- Ageorges, V., Monteiro, R., Leroy, S., Burgess, C. M., Pizza, M., Chaucheyras-Durand, F., & Desvaux, M. (2020) Molecular determinants of surface colonisation in diarrhoeagenic *Escherichia coli* (DEC): from bacterial adhesion to biofilm formation. *FEMS Microbiol. Rev.* **44**, 314–350.
- Alikhan, N. F., Petty, N. K., Zakour, N. L. & Beatson, S. A. (2011) BLAST Ring Image Generator (BRIG): simple prokaryote genome comparisons. *BMC Genomics.* **12**, 1–10.
- Arndt, D., Grant, J. R., Marcu, A., Sajed, T., Pon, A., Liang, Y., & Wishart, D. S. (2016) PHASTER: a better, faster version of the PHAST phage search tool. *Nucleic Acids Res.* **44**, W16–W21.
- Bankevich, A., Nurk, S., Antipov, D., Gurevich, A. A., Dvorkin, M., Kulikov, A. S. *et al.* (2012) SPAdes: a new genome assembly algorithm and its applications to single-cell sequencing. *J Comput Biol.* **19**, 455–477.
- Barrios, A. F., Zuo, R., Ren, D. & Wood, T. K. (2006) Hha, YbaJ, and OmpA regulate *Escherichia coli* K12 biofilm formation and conjugation plasmids abolish motility. *Biotechnol Bioeng.* **93**, 188–200.

- Bertsch, D., Uruty, A., Anderegg, J., Lacroix, C., Perreten, V., & Meile, L. (2013). Tn6198, a novel transposon containing the trimethoprim resistance gene *dfrG* embedded into a Tn916 element in *Listeria monocytogenes*. *J Antimicrob Chemother.* 68: 986–991.
- Bolger, A. M., Lohse, M. & Usadel, B. (2014) Trimmomatic: a flexible trimmer for Illumina sequence data. *Bioinformatics.* 30, 2114–2120.
- Bowran, K., & Palmer, T. (2021). Extreme genetic diversity in the type VII secretion system of *Listeria monocytogenes* suggests a role in bacterial antagonism. *Microbiology* 167: 001034.
- Brynildsrud, O., Bohlin, J., Scheffer, L. & Eldholm, V. (2016) Rapid scoring of genes in microbial pan-genome-wide association studies with Scoary. *Genome Biol.* 17, 1–9.
- Castro, H., Jaakkonen, A., Hakkinen, M., Korkeala, H. & Lindström, M. (2018) Occurrence, persistence, and contamination routes of *Listeria monocytogenes* genotypes on three Finnish dairy cattle farms: a longitudinal study. *Appl. Environ. Microbiol.* 84, e02000-17.
- Chen, M. Y., Lira, F., Liang, H. Q., Wu, R. T., Duan, J. H., Liao, X. P. *et al.* (2016) Multilevel selection of *bcrABDR*-mediated bacitracin resistance in *Enterococcus faecalis* from chicken farms. *Sci. Rep.* 6, 1-7.
- Croucher, N. J., Page, A. J., Connor, T. R., Delaney, A. J., Keane, J. A., Bentley, S. D. *et al.* (2015) Rapid phylogenetic analysis of large samples of recombinant bacterial whole genome sequences using Gubbins. *Nucleic Acids Res.* 43, e15–e15.
- Esteban, J. I., Oporto, B., Aduriz, G., Juste, R. A. & Hurtado, A. (2009) Faecal shedding and strain diversity of *Listeria monocytogenes* in healthy ruminants and swine in Northern Spain. *BMC Vet. Res.* 5, 1–10.
- Fox, E., O'Mahony, T., Clancy, M., Dempsey, R., O'Brien, M. & Jordan, K. (2009) *Listeria monocytogenes* in the Irish dairy farm environment. *J. Food Protect.* 72, 1450–1456.
- Franz, C. M., Holzappel, W. H. & Stiles, M. E. (1999) *Enterococci* at the crossroads of food safety?. *Int. J. Food Microbiol.* 47, 1–24.



Garneau, J. E., Dupuis, M. È., Villion, M., Romero, D. A., Barrangou, R., Boyaval, P. *et al.*

(2010) The CRISPR/Cas bacterial immune system cleaves bacteriophage and plasmid DNA.

*Nature*. **468**, 67–71.

Gilmour, M. W., Graham, M., Van Domselaar, G., Tyler, S., Kent, H., Trout-Yakel, K. M., *et al.*

(2010). High-throughput genome sequencing of two *Listeria monocytogenes* clinical

isolates during a large foodborne outbreak. *BMC Genomics* **11**, 1–15.

Göker, M., García-Blázquez, G., Voglmayr, H., Tellería, M. T. & Martín, M. P. (2009)

Molecular taxonomy of phytopathogenic fungi: a case study in *Peronospora*. *PloS One*. **4**,

e6319.

Gray, M. J., Freitag, N. E. & Boor, K. J. (2006) How the bacterial pathogen *Listeria*

*monocytogenes* mediates the switch from environmental Dr. Jekyll to pathogenic Mr. Hyde.

*Infect. Immun.* **74**, 2505–2512.

Guindon, S., Dufayard, J. F., Lefort, V., Anisimova, M., Hordijk, W., & Gascuel, O. (2010)

New algorithms and methods to estimate maximum-likelihood phylogenies: assessing the

performance of PhyML 3.0. *Syst. Biol.* **59**, 307–321.

Gurevich, A., Saveliev, V., Vyahhi, N. & Tesler, G. (2013) QUASt: quality assessment tool

for genome assemblies. *Bioinformatics*. **29**, 1072–1075.

Harrison, E. & Brockhurst, M. A. (2017) Ecological and evolutionary benefits of temperate

phage: what does or doesn't kill you makes you stronger. *BioEssays*. **39**, 1700112.

Harvey, J. & Gilmour, A. (2001) Characterization of recurrent and sporadic *Listeria*

*monocytogenes* isolates from raw milk and nondairy foods by pulsed-field gel electrophoresis,

monocin typing, plasmid profiling, and cadmium and antibiotic resistance determination. *Appl.*

*Environ. Microbiol.* **67**, 840–847.

Haubert, L., da Cunha, C. E., Lopes, G. V. & da Silva, W. P. (2018) Food isolate *Listeria monocytogenes* harboring *tetM* gene plasmid-mediated exchangeable to *Enterococcus faecalis* on the surface of processed cheese. *Food Res. Int.* **107**, 503–508.

Hellström, S., Laukkanen, R., Siekkinen, K. M., Ranta, J., Majjala, R., & Korkeala, H. (2010) *Listeria monocytogenes* contamination in pork can originate from farms. *J Food Protect.* **73**, 641–648.

Hingston, P., Brenner, T., Truelstrup Hansen, L. & Wang, S. (2019). Comparative analysis of *Listeria monocytogenes* plasmids and expression levels of plasmid-encoded genes during growth under salt and acid stress conditions. *Toxins.* **11**, 426.

Ho, A. J., Lappi, V. R. & Wiedmann, M. (2007) Longitudinal monitoring of *Listeria monocytogenes* contamination patterns in a farmstead dairy processing facility. *J. Dairy Sci.* **90**, 2517–2524.

Hurley, D., Luque-Sastre, L., Parker, C. T., Huynh, S., Eshwar, A. K., Nguyen, S. V., *et al.* (2019) Whole-genome sequencing-based characterization of 100 *Listeria monocytogenes* isolates collected from food processing environments over a four-year period. *MSphere* **4**, e00252-19.

Jahan, M. & Holley, R. A. (2016) Transfer of antibiotic resistance from *Enterococcus faecium* of fermented meat origin to *Listeria monocytogenes* and *Listeria innocua*. *Lett. Appl. Microbiol.* **62**, 304–310.

Katz, L. S., Griswold, T., Williams-Newkirk, A. J., Wagner, D., Petkau, A., Sieffert, C., *et al.* (2017) A comparative analysis of the Lyve-SET phylogenomics pipeline for genomic epidemiology of foodborne pathogens. *Front Microbiol.* **8**, 375.

Keto-Timonen, R., Tolvanen, R., Lunden, J. & Korkeala, H. (2007) An 8-year surveillance of the diversity and persistence of *Listeria monocytogenes* in a chilled food processing plant analyzed by amplified fragment length polymorphism. *J. Food Protect.* **70**, 1866–1873.

Kremer, P. H. C., Lees, J. A., Koopmans, M. M., Ferwerda, B., Arends, A. W. M., Feller, M. M. *et al.* (2017) Benzalkonium tolerance genes and outcome in *Listeria monocytogenes* meningitis. *Clin. Microbiol. Infect.* **23**, 265.e1–265.e7.

Kuenne, C., Voget, S., Pischmarov, J., Oehm, S., Goesmann, A., Daniel, R. *et al.* (2010) Comparative analysis of plasmids in the genus *Listeria*. *PLoS One.* **5**, e12511.

Kuenne, C., Billion, A., Mraheil, M. A., Strittmatter, A., Daniel, R., Goesmann, A., *et al.* (2013) Reassessment of the *Listeria monocytogenes* pan-genome reveals dynamic integration hotspots and mobile genetic elements as major components of the accessory genome. *BMC Genomics.* **14**, 1–19.

Kumar, S., Stecher, G. & Tamura, K. (2016) MEGA7: molecular evolutionary genetics analysis version 7.0 for bigger datasets. *Mol. Biol. Evol.* **33**, 1870–1874.

Lebrun, M., Audurier, A. & Cossart, P. (1994) Plasmid-borne cadmium resistance genes in *Listeria monocytogenes* are present on Tn5422, a novel transposon closely related to Tn917. *J. Bacteriol.* **176**, 3049–3061.

Lee, S., Ward, T. J., Jima, D. D., Parsons, C. & Kathariou S. (2017) The arsenic resistance-associated *Listeria* genomic island LGI2 exhibits sequence and integration site diversity and a propensity for three *Listeria monocytogenes* clones with enhanced virulence. *Appl. Environ. Microbiol.* **83**, e01189-17.

Lee, S., Ward, T. J., Siletzky, R. M. & Kathariou, S. (2012) Two novel type II restriction-modification systems occupying genomically equivalent locations on the chromosomes of *Listeria monocytogenes* strains. *Appl. Environ. Microbiol.* **78**, 2623–2630.

León-Sampedro, R., Novais, C., Peixe, L., Baquero, F. & Coque, T. M. (2016) Diversity and evolution of the Tn5801-*tet*(M)-like integrative and conjugative elements among *Enterococcus*, *Streptococcus*, and *Staphylococcus*. *Antimicrob. Agents Chemother.* **60**, 1736–1746.

- Lundén, J., Autio, T., Markkula, A., Hellström, S. & Korkeala, H. (2003) Adaptive and cross-adaptive responses of persistent and non-persistent *Listeria monocytogenes* strains to disinfectants. *Int. J. Food Microbiol.* **82**, 265–272.
- Manson, J. M., Keis, S., Smith, J. M., & Cook, G. M. (2004) Acquired bacitracin resistance in *Enterococcus faecalis* is mediated by an ABC transporter and a novel regulatory protein, BcrR. *Antimicrob. Agents Chemother.* **48**, 3743-3748.
- Maury, M. M., Tsai, Y. H., Charlier, C., Touchon, M., Chenal-Francisque, V., Leclercq, A., *et al.* (2016). Uncovering *Listeria monocytogenes* hypervirulence by harnessing its biodiversity. *Nat Genet.* **48**: 308.
- Maury, M. M., Bracq-Dieye, H., Huang, L., Vales, G., Lavina, M., Thouvenot, P., *et al.* (2019) Hypervirulent *Listeria monocytogenes* clones' adaption to mammalian gut accounts for their association with dairy products. *Nat. Commun.* **10**, 2488.
- Meier, A. B., Guldemann, C., Markkula, A., Pöntinen, A., Korkeala, H., & Tasara, T. (2017) Comparative phenotypic and genotypic analysis of Swiss and Finnish *Listeria monocytogenes* isolates with respect to benzalkonium chloride resistance. *Front. Microbiol.* **8**, 397.
- Meier-Kolthoff, J. P., Auch, A. F., Klenk, H.P. & Göker, M. (2013) Genome sequence-based species delimitation with confidence intervals and improved distance functions. *BMC Bioinformatics.* **14**, 1–4.
- Meier-Kolthoff, J. P., Göker, M. (2017) VICTOR: genome-based phylogeny and classification of prokaryotic viruses. *Bioinformatics.* **33**, 3396–3404.
- Miettinen, M. K., Björkroth, K. J. & Korkeala, H. J. (1999) Characterization of *Listeria monocytogenes* from an ice cream plant by serotyping and pulsed-field gel electrophoresis. *Int. J. Food Microbiol.* **46**, 187–192.

Moura, A., Criscuolo, A., Pouseele, H., Maury, M. M., Leclercq, A., Tarr, C. *et al.* (2016)

Whole genome-based population biology and epidemiological surveillance of *Listeria monocytogenes*. *Nat. Microbiol.* **2**, 16185.

Müller, A., Rychli, K., Muhterem-Uyar, M., Zaiser, A., Stessl, B., Guinane, C. M. *et al.* (2013)

Tn6188 -a novel transposon in *Listeria monocytogenes* responsible for tolerance to benzalkonium chloride. *PLoS One.* **8**, e76835.

Naditz, A. L., Dzieciol, M., Wagner, M. & Schmitz-Esser, S. (2019) Plasmids contribute to

food processing environment-associated stress survival in three *Listeria monocytogenes* ST121, ST8, and ST5 strains. *Int. J. Food Microbiol.* **299**, 39–46.

Nightingale, K. K., Schukken, Y. H., Nightingale, C. R., Fortes, E. D., Ho, A. J., Her, Z. *et al.*

(2004) Ecology and transmission of *Listeria monocytogenes* infecting ruminants and in the farm environment. *Appl. Environ. Microbiol.* **70**, 4458–4467 (2004).

Page, A. J., Cummins, C. A., Hunt, M., Wong, V. K., Reuter, S., Holden, M. T. *et al.* (2015)

Roary: rapid large-scale prokaryote pan genome analysis. *Bioinformatics.* **31**, 3691–3693.

Palma, F., Brauge, T., Radomski, N., Mallet, L., Felten, A., Mistou, M. Y., Brisabois, A.,

Guillier, L. & Midelet-Bourdin, G. (2020). Dynamics of mobile genetic elements of *Listeria monocytogenes* persisting in ready-to-eat seafood processing plants in France. *BMC Genomics*, **21**: 1-20.

Parsons, C., Lee, S. & Kathariou, S. (2020) Dissemination and conservation of cadmium and

arsenic resistance determinants in *Listeria* and other Gram-positive bacteria. *Mol. Microbiol.* **113**, 560–569.

Pasechnek, A., Rabinovich, L., Stadnyuk, O., Azulay, G., Mioduser, J., Argov, T. *et al.* (2020)

Active lysogeny in *Listeria monocytogenes* is a bacteria-phage adaptive response in the mammalian environment. *Cell Rep.* **32**, 107956.

- Pasquali, F., Palma, F., Guillier, L., Lucchi, A., De Cesare, A., & Manfreda, G. (2018) *Listeria monocytogenes* sequence types 121 and 14 repeatedly isolated within one year of sampling in a rabbit meat processing plant: persistence and ecophysiology. *Front. Microbiol.* **9**, 596.
- Pightling, A. W., Pettengill, J. B., Luo, Y., Baugher, J. D., Rand, H., & Strain, E. (2018) Interpreting whole-genome sequence analyses of foodborne bacteria for regulatory applications and outbreak investigations. *Frontiers Microbiol.* **9**, 1482.
- Pitcher, D. G., Saunders, N. A. & Owen, R. J. (1989) Rapid extraction of bacterial genomic DNA with guanidium thiocyanate. *Lett. Appl. Microbiol.* **8**, 151–156.
- Pöntinen, A., Aalto-Araneda, M., Lindström, M. & Korkeala, H. (2017) Heat resistance mediated by pLM58 plasmid-borne ClpL in *Listeria monocytogenes*. *Msphere.* **2**, e00364-17.
- Price, V. J., Huo, W., Sharifi, A. & Palmer, K. L. (2016) CRISPR-Cas and restriction-modification act additively against conjugative antibiotic resistance plasmid transfer in *Enterococcus faecalis*. *Msphere.* **1**, e00064-16.
- Ragon, M., Wirth, T., Hollandt, F., Lavenir, R., Lecuit, M., Le Monnier, A., & Brisse, S. (2008). A new perspective on *Listeria monocytogenes* evolution. *PLoS Pathog* **4**: e1000146.
- Samelis, J. & Metaxopoulos, J. (1999) Incidence and principal sources of *Listeria* spp. and *Listeria monocytogenes* contamination in processed meats and a meat processing plant. *Food Microbiol.* **16**, 465–477.
- Schmitz-Esser, S., Anast, J. M., & Cortes, B. W. (2021) A large-scale sequencing-based survey of plasmids in *Listeria monocytogenes* reveals global dissemination of plasmids. *Front Microbiol* **12**, 510.
- Seemann, T. (2014) Prokka: rapid prokaryotic genome annotation. *Bioinformatics.* **30**, 2068–2069.
- Smith, A. M., Tau, N. P., Smouse, S. L., Allam, M., Ismail, A., Ramalwa, N. R. *et al.* (2019) Outbreak of *Listeria monocytogenes* in South Africa, 2017–2018: laboratory activities and

experiences associated with whole-genome sequencing analysis of isolates. *Foodborne Pathog. Dis.* **16**, 524–530.

Stasiewicz, M. J., Oliver, H. F., Wiedmann, M. & den Bakker, H. C. (2015) Whole-genome sequencing allows for improved identification of persistent *Listeria monocytogenes* in food-associated environments. *Appl. Environ. Microbiol.* **81**, 6024–6037.

Sullivan, M. J., Petty, N. K. & Beatson, S. A. (2011) Easyfig: a genome comparison visualizer. *Bioinformatics.* **27**, 1009–1010.

Tansirichaiya, S., Rahman, M. A. & Roberts, A.P. (2019) The transposon registry. *Mobile DNA.* **10**, 1–6.

Wick, R. R., Schultz, M. B., Zobel, J. & Holt, K. E. (2015) Bandage: interactive visualization of de novo genome assemblies. *Bioinformatics.* **31**, 3350–3352

Wood, D. E., & Salzberg, S. L. (2014) Kraken: ultrafast metagenomic sequence classification using exact alignments. *Genome Biol.* **15**, 1–2.

Zink, R., Loessner, M. J., Scherer, S. (1995) Characterization of cryptic prophages (monocins) in *Listeria* and sequence analysis of a holin/endolysin gene. *Microbiology.* **141**, 2577–2584.

484 **Acknowledgements**

485 This research was supported by the Finnish Ministry of Agriculture and Forestry (grant  
486 number 618/03.01.02/2017) and by the Walter Ehrström Foundation. The authors want to  
487 acknowledge Esa Penttinen for his assistance with DNA extraction.

488

489 **Author Contributions**

490 H.C. conducted the analyses and wrote the manuscript. H.C. and M.L. provided the study  
491 materials and designed the study. F.D., H.K. and M.L. supervised the study. All authors  
492 participated in data interpretation and reviewed the manuscript.

493

494 **Competing Interests**

495 The authors have no competing interests to declare.



496 **Figure legends**

497

498 **Fig. 1. *L. monocytogenes* isolates in persistent clades contained on average more**  
499 **prophages and other mobile genetic elements (MGE) than isolates in nonpersistent**  
500 **clades.**

501 **a** *L. monocytogenes* isolates of this study represented 25 unique STs and persistent clades  
502 were detected among the six most prevalent STs. Each circle represents a unique ST and the  
503 area of the circle corresponds to the number of isolates. Doughnut charts illustrate the  
504 proportion of persistent clades (pink) and singleton isolates (aquamarine) for each STs in  
505 which persistent clades were detected.

506 **b, c** Distribution of isolates by number of non-phage MGE (**b**) and prophages (**c**) per genome  
507 among isolates in persistent and nonpersistent clades. The average number of the elements  
508 per genome is also given.

509

510 **Fig. 2. Phylogeny and genomic elements of 250 *L. monocytogenes* dairy farm isolates.**

511 The Lyve-SET 1.1.4f SNP-calling pipeline was used to generate an alignment file of the 250  
512 genomes using *L. monocytogenes* EGD-e (NC\_003210.1) as reference. Recombinant sites  
513 were removed from the alignment using Gubbins 3.0. Maximum likelihood phylogeny was  
514 inferred from concatenated SNP alignment files using PhyML 3.3. The tree was visualized  
515 using FigTree 1.4.4. Pathogenicity islands, plasmids, chromosomally located mobile elements  
516 and prophages were identified from the assemble and annotated draft genomes. The heatmap  
517 is restricted to genomic elements that were detected in this study. Persistent clade numbers  
518 corresponding to Table 1 are shown. Plasmids are categorized by phylogenetic group and

519 prophages by insertion site. L: lineage; ST: multi-locus sequence type; LIPI: *Listeria*  
520 Pathogenicity Island; IS3: *Listeria* IS3-like element; LGI-2: *Listeria* Genomic Island 2.

521

522 **Fig. 3. Occurrence of mobile genetic elements and heavy metal resistance genes among**  
523 **persistent clades and nonpersistent.**

524 Occurrence of plasmids (**a**), chromosomally located mobile elements (**b**), prophages (**C**) and  
525 cadmium and arsenic resistance genes (**d**) among isolates in persistent and nonpersistent  
526 clades. Significant differences between persistent clade isolates and singleton isolates are  
527 denoted by asterisks; \*:  $p < .05$ ; \*\*:  $p < .05$ ; \*\*\*:  $p < .001$ . IS3: *Listeria* IS3-like transposon; LGI-  
528 2: *Listeria* Genomic Island 2. Prophages are categorized by insertion site.

529

530 **Fig. 4. Characterization of plasmids based on RepA**

531 **a** Maximum-Likelihood phylogenetic analysis of the >50 Kb plasmids detected in the present  
532 study, based on the *repA* amino acid sequences. The analysis employed the Jones-Taylor-  
533 Thornton substitution model with 100 bootstraps and was performed using the MEGA7  
534 software. Bootstrap support values above 70 are shown. Plasmids represented three  
535 phylogenetic clades (plasmid groups G1, G2 and G4). Plasmid groups correspond to the  
536 groups established by Kuenne et al., (2010) and Schmitz-Esser et al., (2021). Tip labels  
537 correspond to plasmid names and host genera; plasmids from this study are labelled in blue.

538 **b** G4 plasmids of the *L. monocytogenes* strains HC193 (this study), HC374 (this study) and  
539 FDA550584-30 (SAMN02923676) aligned with >95% identity across the entire length of  
540 pHC143 from this study; plasmids of the *L. monocytogenes* strains 967535  
541 (SAMN15680309) and YA00079283 (SAMN08970420) aligned with >95% identity to most

542 of pHC143. The alignment was generated using the BRIG 0.95. For pHC143, plasmid length  
543 in base pairs (bp) is given.

544

545 **Fig. 5. Phylogeny, gene content and epidemiology of the novel plasmid pHC192.**

546 **a** Maximum-Likelihood phylogenetic analysis of the <10 Kb plasmids detected in the present  
547 study and other related plasmids the *repB* amino acid sequences. Plasmids other than pHC192  
548 were identified and obtained from GenBank using BLASTp. The analysis employed the  
549 Jones-Taylor-Thornton substitution model with 100 bootstraps and was performed using the  
550 MEGA7 software. Node labels indicate bootstrap support values above 70. Tip labels  
551 correspond to plasmid names and host genera; plasmids from this study are labelled in blue.  
552 Tip shapes depict harbourage of resistance genes against antimicrobials (AMR) and biocides  
553 (BCR).

554 **b** The 4.5 Kbp plasmid pHC192, carrying a putative SafE/TauE family sulphite exporter  
555 (WP\_016896343.1). The figure was constructed using the BRIG 0.95. Plasmid length in base  
556 pairs (bp) is given.

557 **c** Number of samples containing no plasmid, pHC192, or both pHC192 and pHC195-2  
558 among persistent clade C7 during each month of sampling. Plasmid prevalence in C7  
559 increased over the one-year sampling period.

560

561 **Fig. 6. Prophages inserted between *rlmCD* and *fosX* belonged genus of *Siphovirus***  
562 **having a broad host species range and a tendency to harbour antimicrobial or heavy**  
563 **metal resistance genes.**

564 Minimum evolutionary tree and taxonomic clustering of six *Listeria* specific phages (genera  
565 2-6); two prophages from this study that were inserted between *rlmCD* and *fosX* genes (genus  
566 1, blue); and prophages from *Listeria* and other Firmicute species obtained from GenBank  
567 (genus 1, black). Phylogenetic analyses and clustering were generated with the Victor online  
568 tool (<https://victor.dsmz.de>), using the model D<sub>6</sub> and 100 bootstrap replicates. The tree was  
569 visualized using FigTree 1.4.4. Bootstrap support values above 70 are shown.

570

571 TABLE 1. Pairwise distances within persistent clades of *L. monocytogenes* from dairy farms  
 572 A – C.

| Clade      | CC <sup>a</sup> | ST <sup>b</sup> | CT <sup>c</sup> | N <sup>d</sup> | Farm | Pairwise distances |         |         |
|------------|-----------------|-----------------|-----------------|----------------|------|--------------------|---------|---------|
|            |                 |                 |                 |                |      | Mean               | Minimum | Maximum |
| C1         | 8               | 8               | 9176            | 8              | A    | 1.5                | 0       | 4       |
| C2         | 14              | 14              | 9177            | 34             | A    | 3.6                | 0       | 12      |
| C3         | 14              | 91              | 9178            | 18             | A    | 2.6                | 0       | 7       |
| C4         | 14              | 91              | 9179            | 8              | A, B | 2                  | 0       | 6       |
| C5         | 18              | 18              | 9180            | 8              | B    | 3.3                | 0       | 8       |
| C6         | 18              | 18              | 9181            | 6              | B    | 1.7                | 0       | 10      |
| C7         | 20              | 20              | 9182            | 32             | C    | 2.4                | 0       | 7       |
| C8         | 20              | 20              | 9189            | 5              | B    | 3.5                | 0       | 9       |
| C9         | 20              | 20              | 9183            | 6              | A    | 3.9                | 0       | 10      |
| C10        | 20              | 20              | 9184            | 5              | B    | 2.4                | 0       | 6       |
| C11        | 20              | 20              | 9185            | 9              | C    | 5.8                | 0       | 11      |
| C12        | 20              | 20              | 9186            | 4              | B    | 1.5                | 0       | 6       |
| C13        | 37              | 37              | 9187            | 20             | A    | 2.6                | 0       | 7       |
| C14        | 37              | 37              | 9188            | 7              | A    | 2.2                | 0       | 6       |
| All clades |                 |                 |                 |                |      | 2.8                | 0       | 8       |

573 <sup>a</sup> CC: Clonal complex

574 <sup>b</sup> ST: Multi-locus sequence typing (MLST) profile

575 <sup>c</sup> CT: core genome multi-locus sequence typing (cgMLST) profile

576 <sup>d</sup> N: Number of isolates in the persistent clade.

577

**a****Clades**

nonpersistent

persistent

**Serogroup**

IIa

IIb

IVb

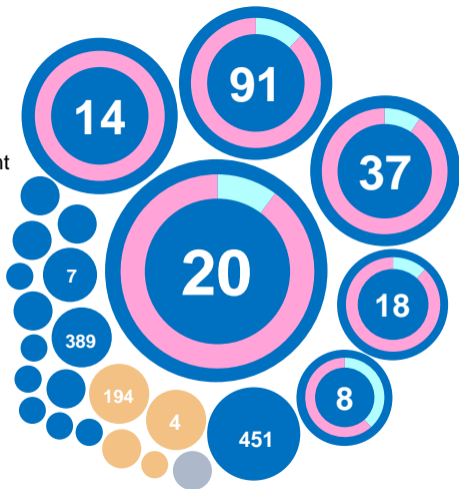**b****MGE count per genome**

0 1 2 3

**Mean count**

Nonpersistent

Persistent

0 % 20 % 40 % 60 % 80 % 100 %

0.8

1.2

**c****Prophage count per genome**

1 2 3 4

**Mean count**

Nonpersistent

Persistent

0 % 20 % 40 % 60 % 80 % 100 %

2.4

2.8

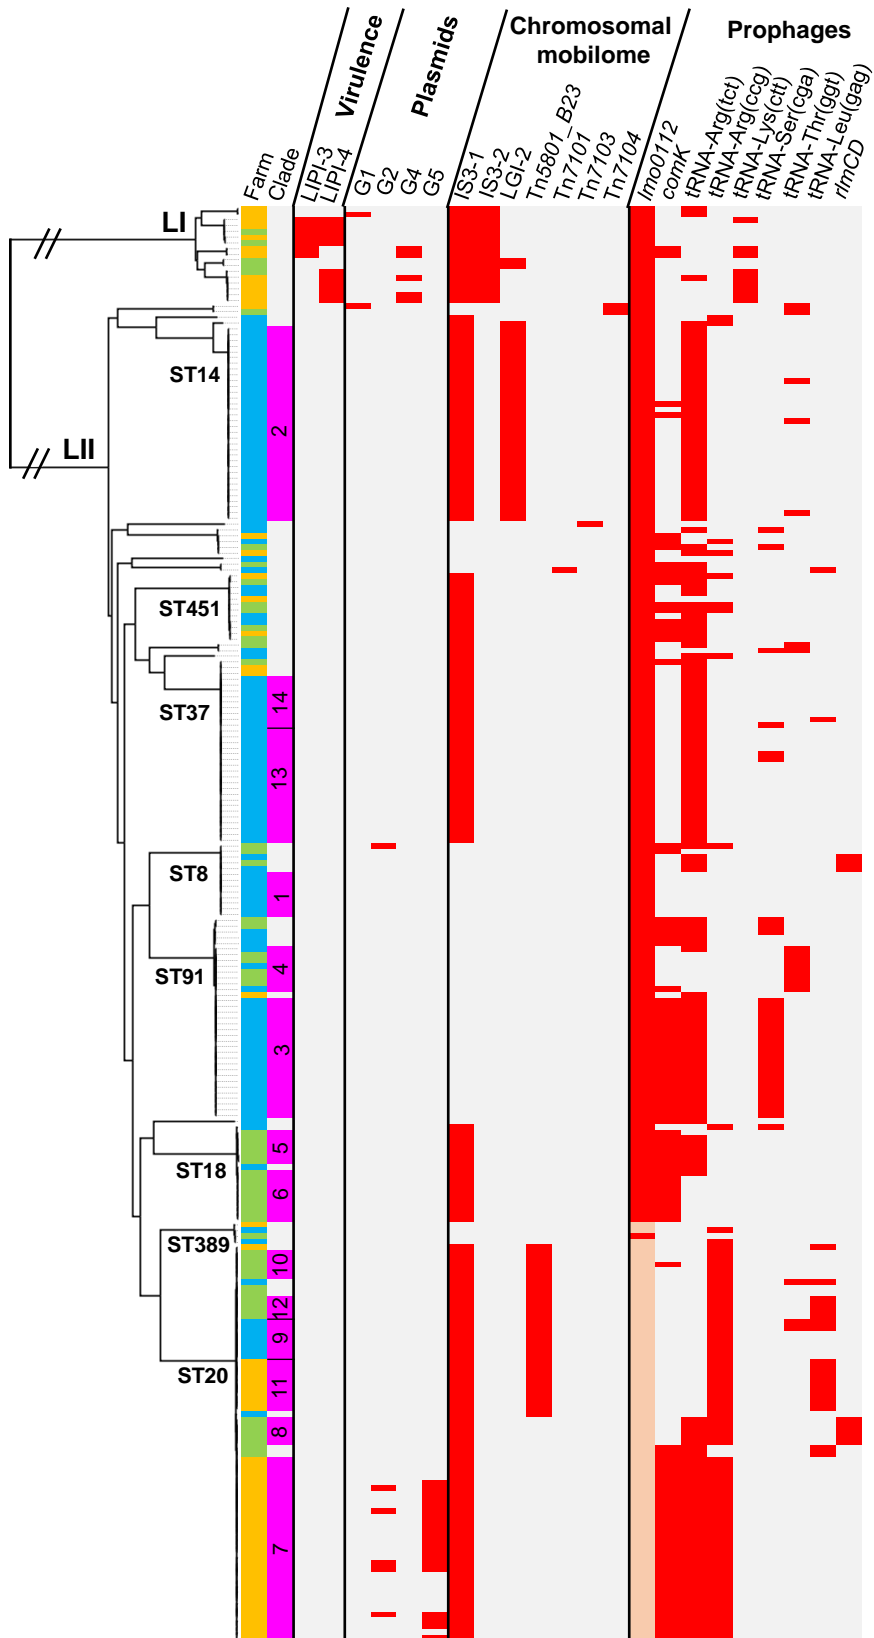

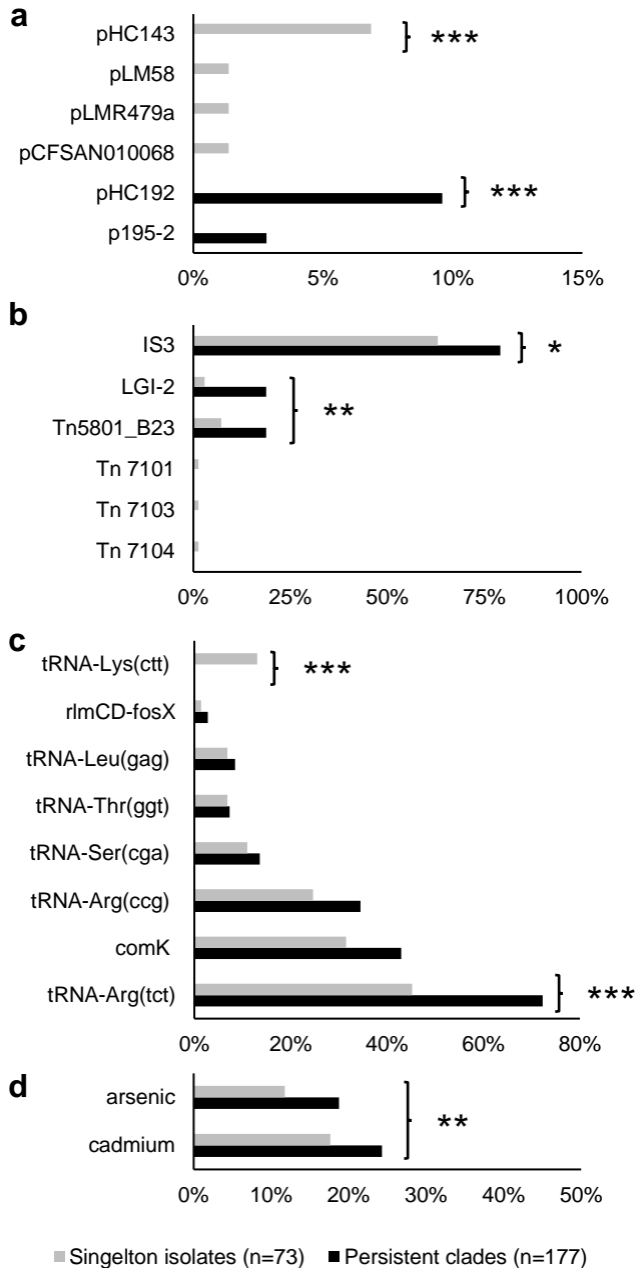



**a****Plasmid group**

- G1
- G2
- G3
- G4

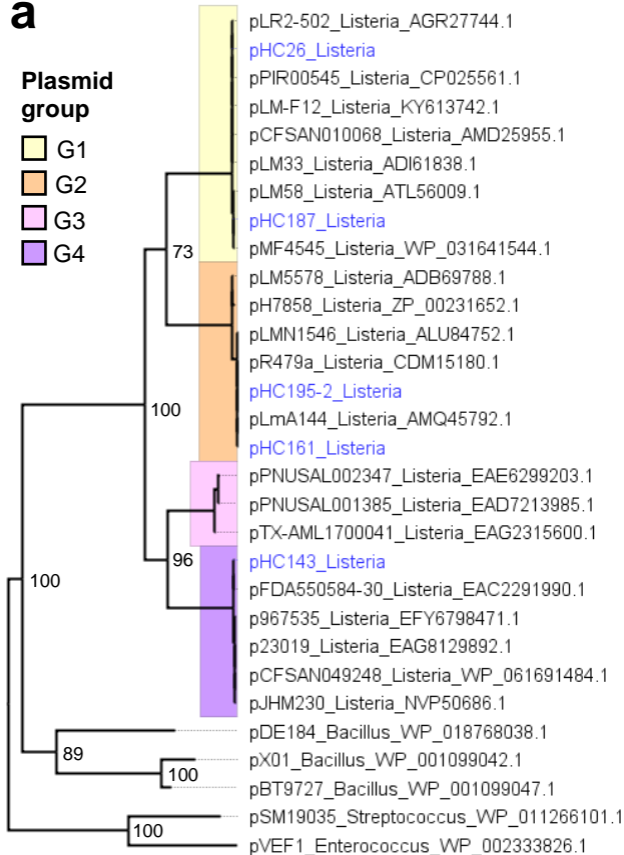**b**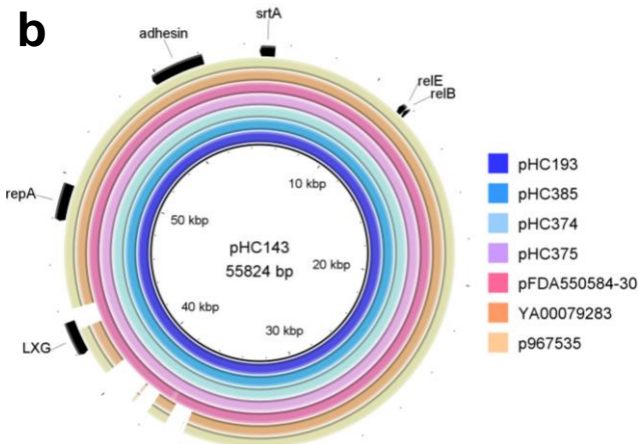

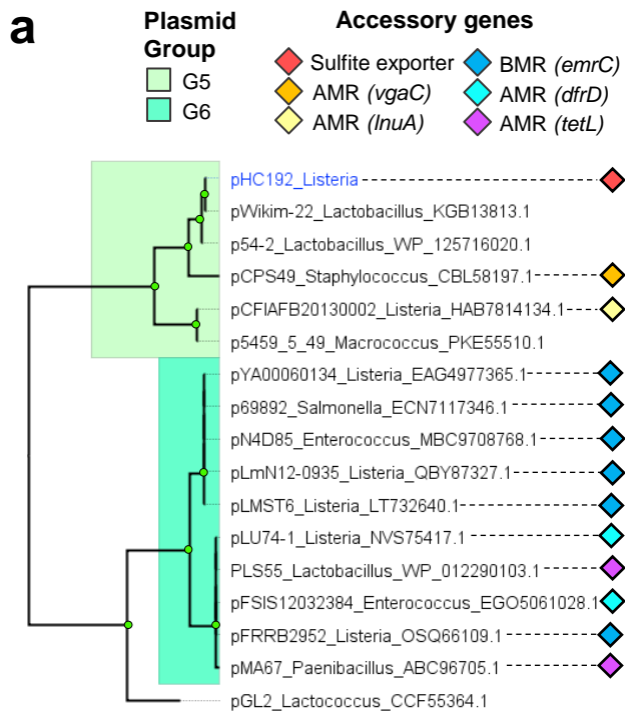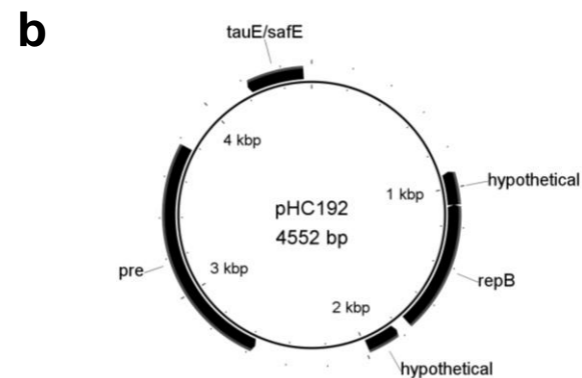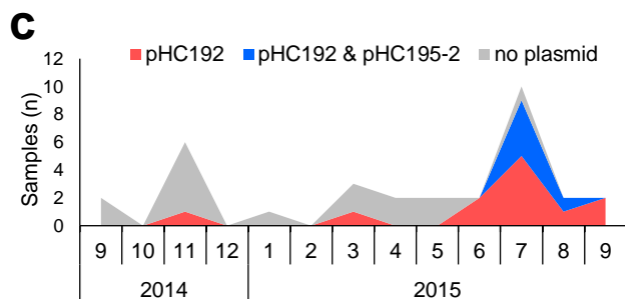

## Resistome

Antimicrobial

Heavy metal

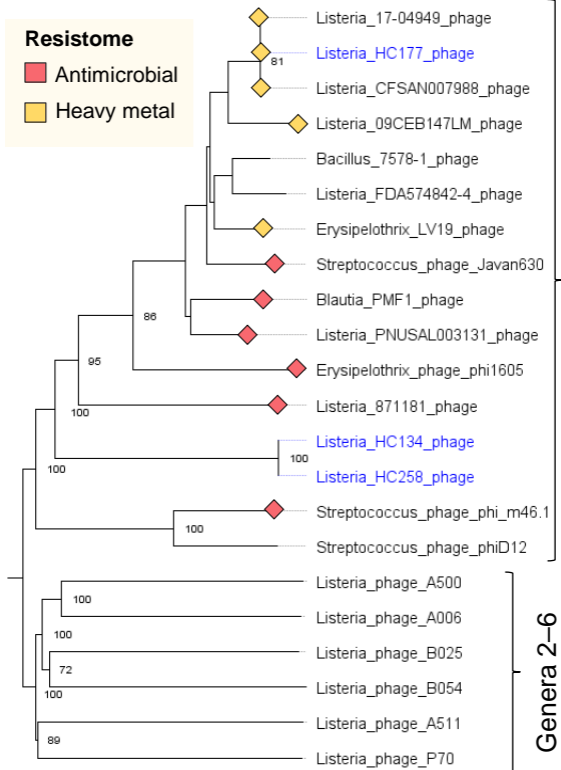

Genus 1

Genera 2-6
